# Supplementary material
Source: PubMed Central journal article supplement (PMC11366072)
Supplement: NIHMS2016885-supplement-1-s2_0-S0161642017317037-mmc1.pdf [file NIHMS2016885-supplement-1-s2_0-S0161642017317037-mmc1.pdf]

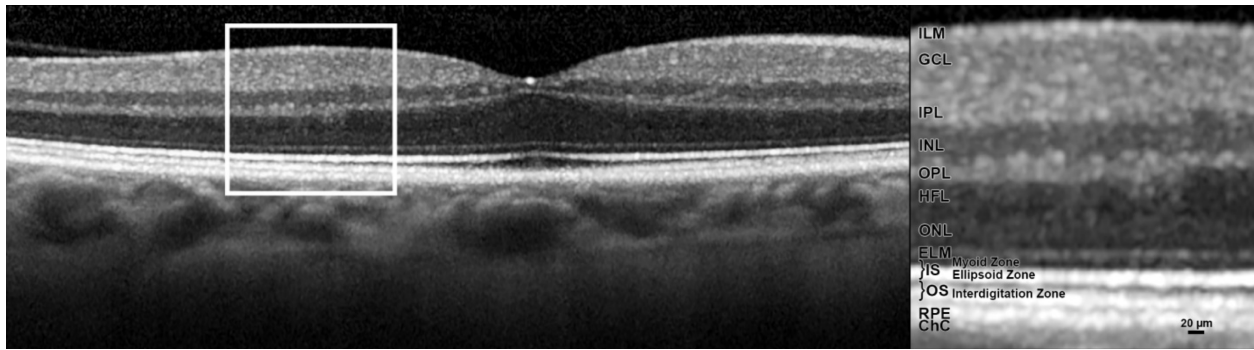

**Supplementary Figure S1. OCT of a normal macula.** Left, panoramic view with frame delimiting area visible in detailed view on the right.

Layers: ILM, inner limiting membrane; GCL, ganglion cell layer; INL, inner nuclear layer; OPL, outer plexiform layer; HFL, Henle fiber layer; ONL, outer nuclear layer; IS, inner segment; OS, outer segments; RPE, retinal pigment epithelium cell bodies; ChC, choriocapillaris. The choriocapillaris is labeled by anticipated location, but is not specifically visible.
