# Supplementary material
Source: PubMed Central journal article supplement (PMC11366072)
Supplement: NIHMS2016885-supplement-1-s2_0-S0161642017317037-mmc3.pdf [file NIHMS2016885-supplement-1-s2_0-S0161642017317037-mmc3.pdf]

## **Appendix 1.**

List of CAM meeting participants (at least one meeting attended and consensus exercises completed):

Giovanni Staurenghi, Frank Holz, Daniel Pauleikhoff, Srinivas Sadda, Rick Spaide, Rick Ferris, Ferdinando Bottoni, Usha Chakravarthy, Emily Chew, Victor Chong, Karl Csaky, Christine Curcio, Ronald Danis, Francois Delori, Scott Fraser, K. Bailey Freund, Juan Grunwald, Robyn Guymer, Tock Han Lim, Jerry Lutty, Glenn Jaffe, Ivana Kim, Jordi Mones, Richard Rosen, Philip Rosenfeld, David Sarraf, Steffen Schmitz-Valckenberg, Sandra Liakopoulos, Janet Sparrow, Ramin Tadayoni, Francesco Viola, Akio Oishi, Sergio Pagliarini, Alan Birm, Barbara Blodi, Dean Bok, Petrus Chang, Gemmy Cheung, Stephano De Angelis, Andrew Dick, Deborah Ferrington, Jeff Fingler, Monika Fleckenstein, Andrea Giani, Carel Hoyng, Imre Lengyel, Andrew Lotery, Robert F. Mullins, Sobha Sivaprasad, Sebastian Wolf, and Ruikang Wang.
